# Supplementary material for: Bimetallic Ni–Co selenide heterostructure aerogel for highly efficient overall water splitting
Source: Royal Society of Chemistry journal article supplement (doi:10.1039/d2qm01082h), 2023-01-01
Supplement: d2qm01082h1.pdf [file d2qm01082h1.pdf]

# Supporting information

## **Bimetallic Ni-Co Selenides Heterostructure Aerogel for High-efficient Overall Water Splitting**

Hongchen Liu, Fan Yang\*, Fengjiang Chen, Sai Che, Neng Chen, Chong Xu, Ni Wu,  
Wenkai Wei and Yongfeng Li

State Key Laboratory of Heavy Oil Processing, China University of Petroleum,  
Beijing, Changping 102249, China

E-mail: yangfan@cup.edu.cn (F. Yang); yfli@cup.edu.cn (Y.F. Li)

---

\* Corresponding authors' E-mail: yangfan@cup.edu.cn (F. Yang), Tel: +86-10-89733897;

\* Corresponding authors' E-mail: yfli@cup.edu.cn (Y.F. Li), Tel: +86-10-89733897.

**Figure S1**

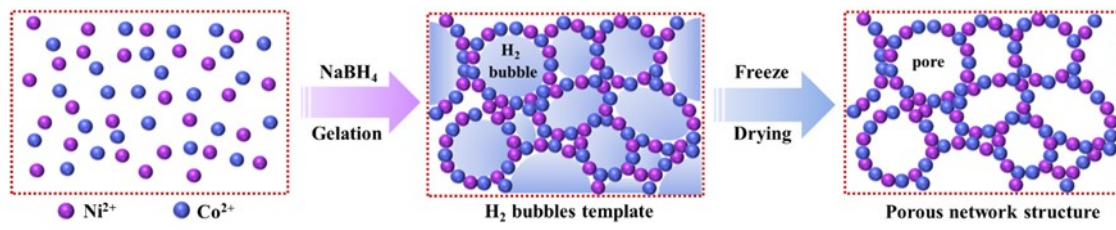

Figure S1. Schematic illustration for the generation of porous network structure.

**Figure S2**

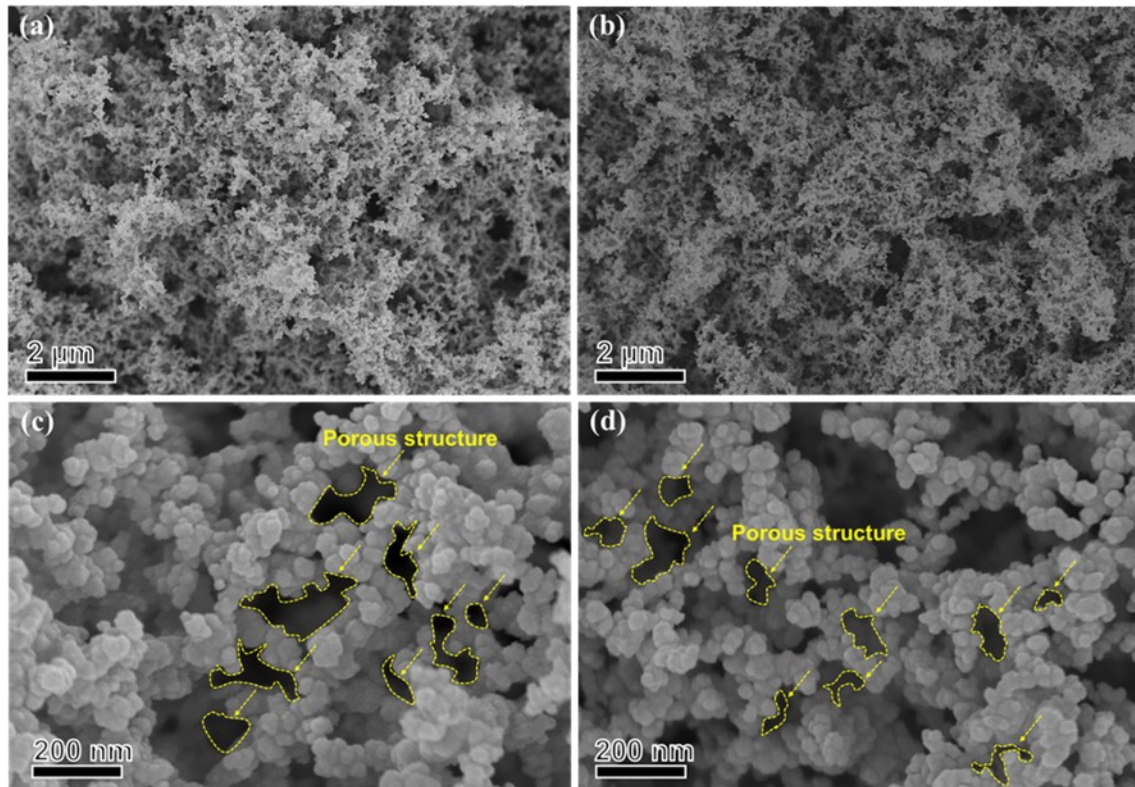

Figure S2. (a-b) Low-resolution SEM images of Ni-Co and NiSe<sub>2</sub>-CoSe<sub>2</sub> aerogels. (c-d) High-resolution SEM images of Ni-Co and NiSe<sub>2</sub>-CoSe<sub>2</sub> aerogels.

**Figure S3**

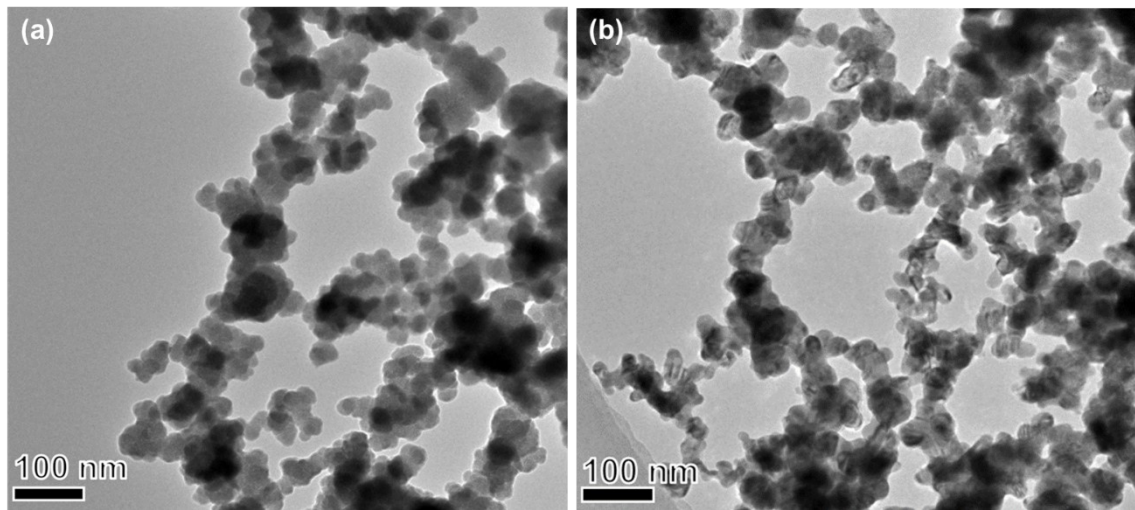

Figure S3. (a) TEM image of Ni-Co aerogel. (b) TEM image of NiSe<sub>2</sub>-CoSe<sub>2</sub> aerogel.

**Figure S4**

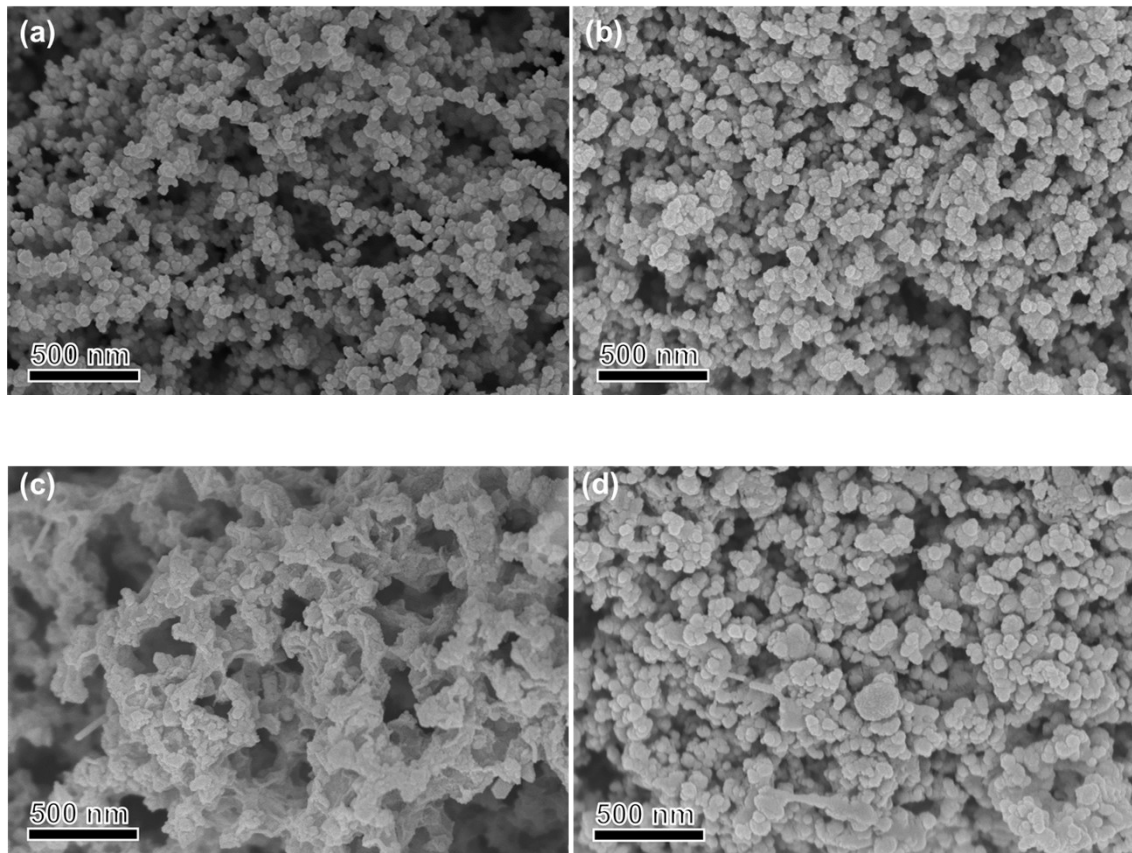

Figure S4. (a) SEM image of NiSe<sub>2</sub>-CoSe<sub>2</sub>-2:1 aerogel. (b) SEM image of NiSe<sub>2</sub>-CoSe<sub>2</sub>-1:2 aerogel. (c) SEM image of NiSe<sub>2</sub> aerogel. (d) SEM image of CoSe<sub>2</sub> aerogel.

## Figure S5

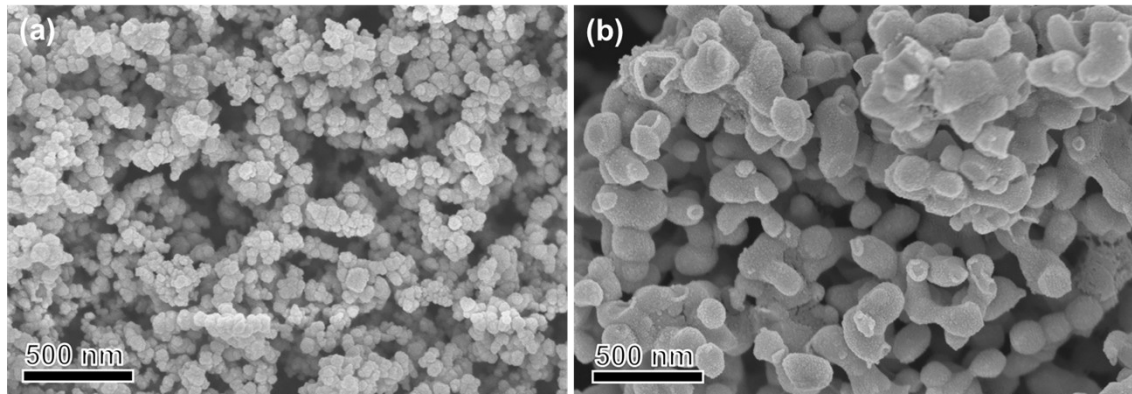

Figure S5. (a) SEM image of NiSe<sub>2</sub>-CoSe<sub>2</sub>-300 aerogel. (b) SEM image of NiSe<sub>2</sub>-CoSe<sub>2</sub>-500 aerogel.

**Figure S6**

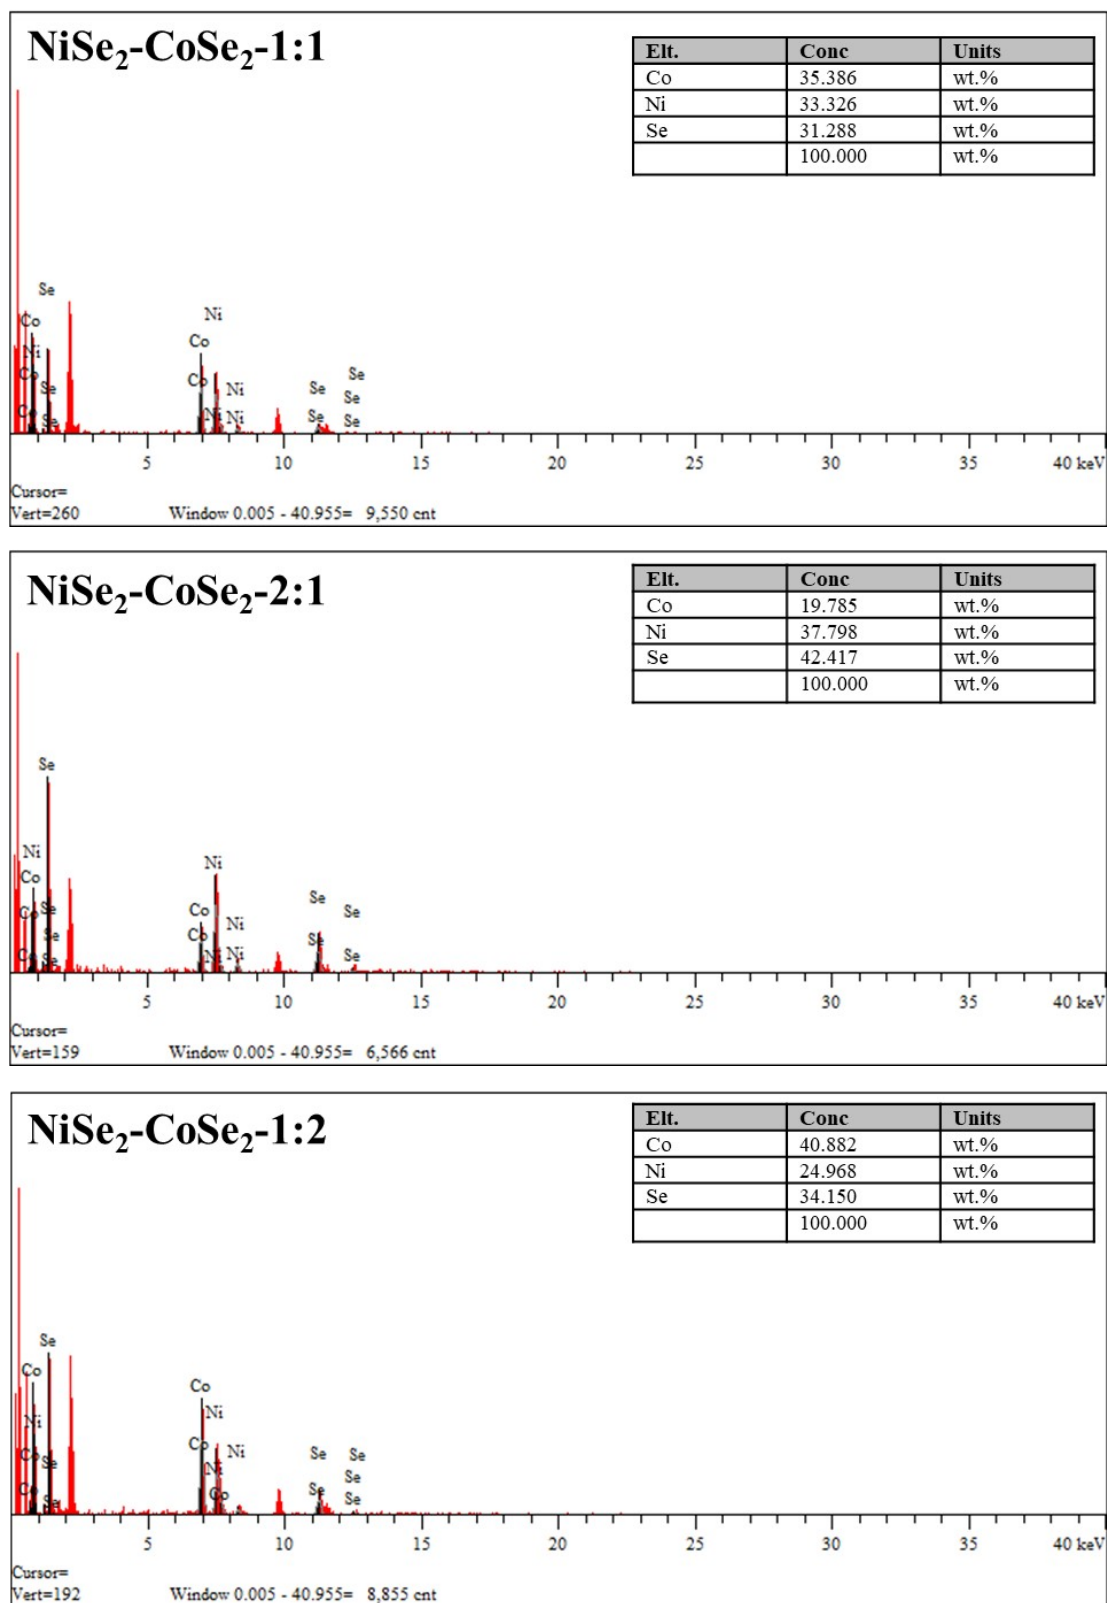

Figure S6. SEM-EDS of NiSe<sub>2</sub>-CoSe<sub>2</sub>-1:1, NiSe<sub>2</sub>-CoSe<sub>2</sub>-2:1 and NiSe<sub>2</sub>-CoSe<sub>2</sub>-1:2 aerogels.

**Figure S7**

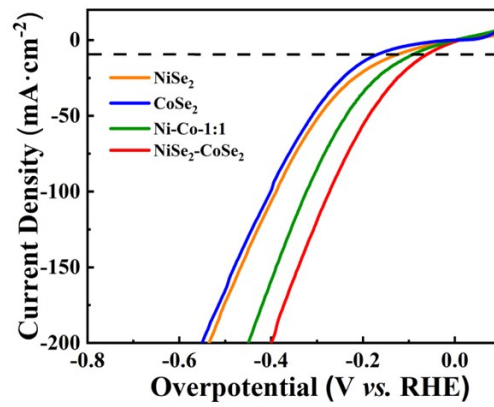

Figure S7. Polarization LSV curves without IR-correction of NiSe<sub>2</sub>, CoSe<sub>2</sub>, Ni-Co, and NiSe<sub>2</sub>-CoSe<sub>2</sub> aerogels toward HER in 1.0M KOH.



**Figure S8**

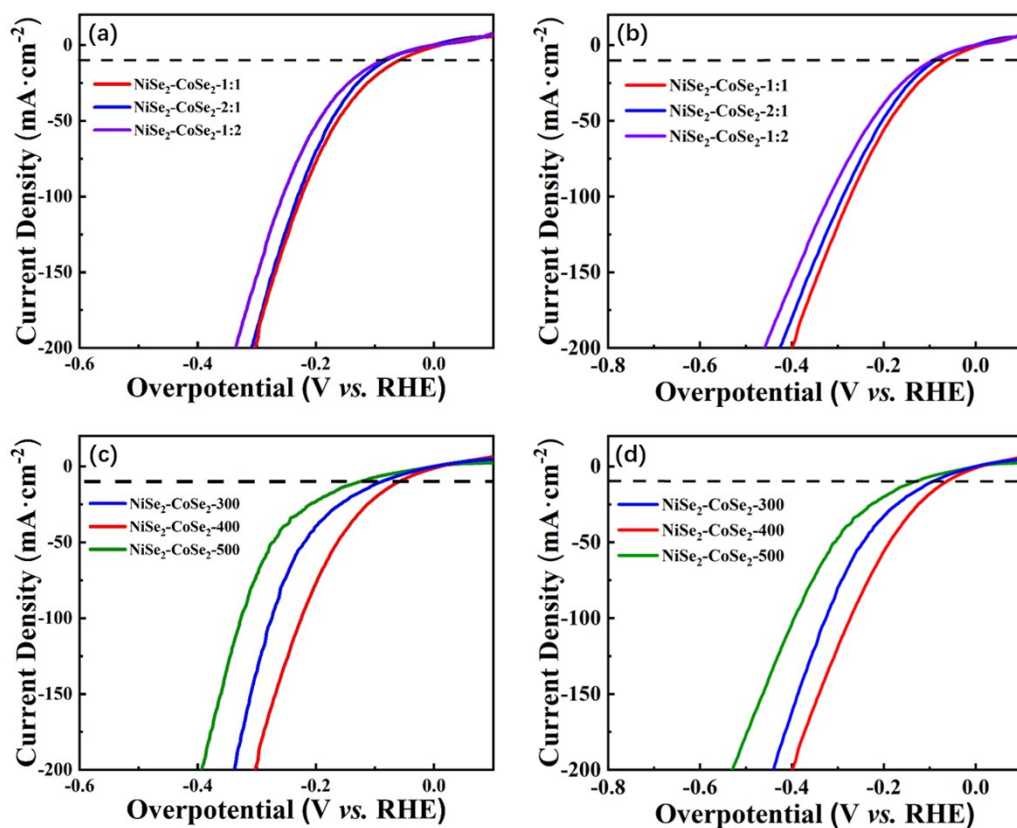

Figure S8. (a-b) Polarization LSV curves of  $\text{NiSe}_2\text{-CoSe}_2$ -1:1,  $\text{NiSe}_2\text{-CoSe}_2$ -2:1 and  $\text{NiSe}_2\text{-CoSe}_2$ -1:2 aerogels toward HER in 1.0M KOH (with and without IR-correction). (c-d) Polarization LSV curves of  $\text{NiSe}_2\text{-CoSe}_2$ -300,  $\text{NiSe}_2\text{-CoSe}_2$ -400 and  $\text{NiSe}_2\text{-CoSe}_2$ -500 aerogels toward HER in 1.0M KOH (with and without IR-correction).

**Figure S9**

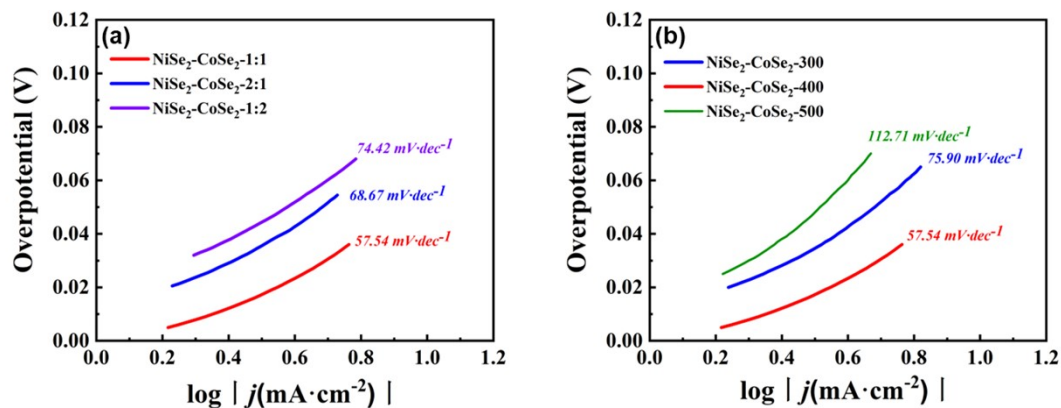

Figure S9. (a) Tafel slopes of NiSe<sub>2</sub>-CoSe<sub>2</sub>-1:1, NiSe<sub>2</sub>-CoSe<sub>2</sub>-2:1 and NiSe<sub>2</sub>-CoSe<sub>2</sub>-1:2 aerogels toward HER in 1.0M KOH. (b) Tafel slopes of NiSe<sub>2</sub>-CoSe<sub>2</sub>-300, NiSe<sub>2</sub>-CoSe<sub>2</sub>-400 and NiSe<sub>2</sub>-CoSe<sub>2</sub>-500 aerogels toward HER in 1.0M KOH.

**Figure S10**

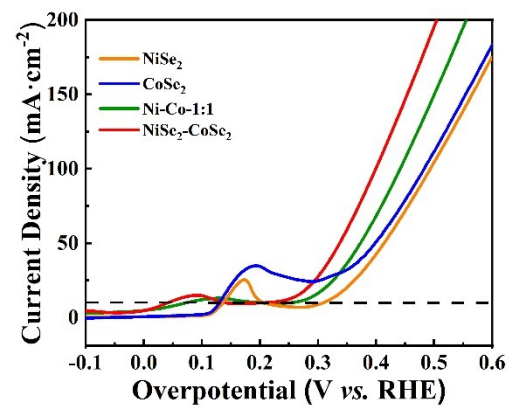

Figure S10. Polarization LSV curves without IR-correction of NiSe<sub>2</sub>, CoSe<sub>2</sub>, Ni-Co, and NiSe<sub>2</sub>-CoSe<sub>2</sub> aerogels toward OER in 1.0M KOH.

**Figure S11**

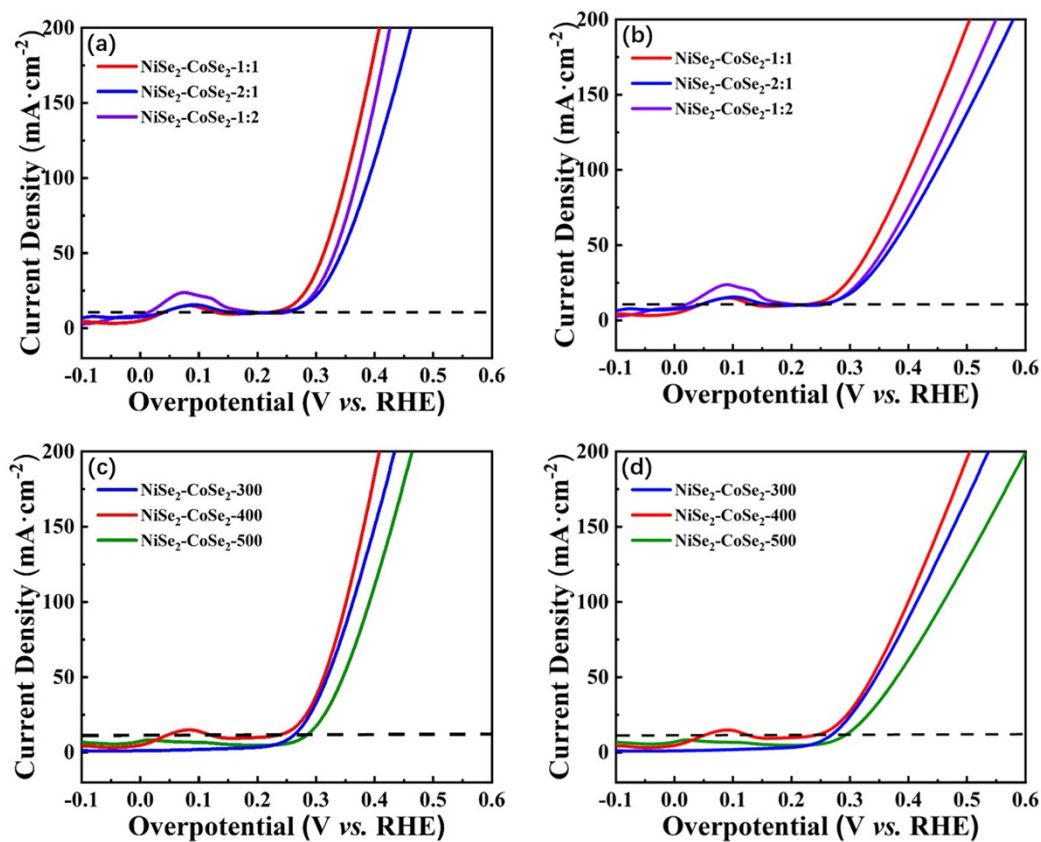

Figure S11. (a-b) Polarization LSV curves of NiSe<sub>2</sub>-CoSe<sub>2</sub>-1:1, NiSe<sub>2</sub>-CoSe<sub>2</sub>-2:1 and NiSe<sub>2</sub>-CoSe<sub>2</sub>-1:2 aerogels toward OER in 1.0M KOH (with and without IR-correction). (c-d) Polarization LSV curves of NiSe<sub>2</sub>-CoSe<sub>2</sub>-300, NiSe<sub>2</sub>-CoSe<sub>2</sub>-400 and NiSe<sub>2</sub>-CoSe<sub>2</sub>-500 aerogels toward OER in 1.0M KOH (with and without IR-correction).

**Figure S12**

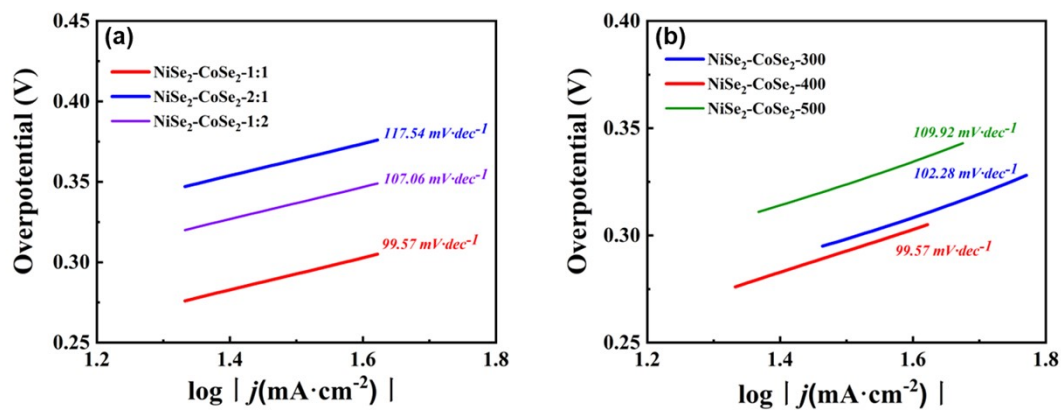

Figure S12. (a) Tafel slopes of NiSe<sub>2</sub>-CoSe<sub>2</sub>-1:1, NiSe<sub>2</sub>-CoSe<sub>2</sub>-2:1 and NiSe<sub>2</sub>-CoSe<sub>2</sub>-1:2 aerogels toward OER in 1.0M KOH. (b) Tafel slopes of NiSe<sub>2</sub>-CoSe<sub>2</sub>-300, NiSe<sub>2</sub>-CoSe<sub>2</sub>-400 and NiSe<sub>2</sub>-CoSe<sub>2</sub>-500 aerogels toward OER in 1.0M KOH.

**Figure S13**

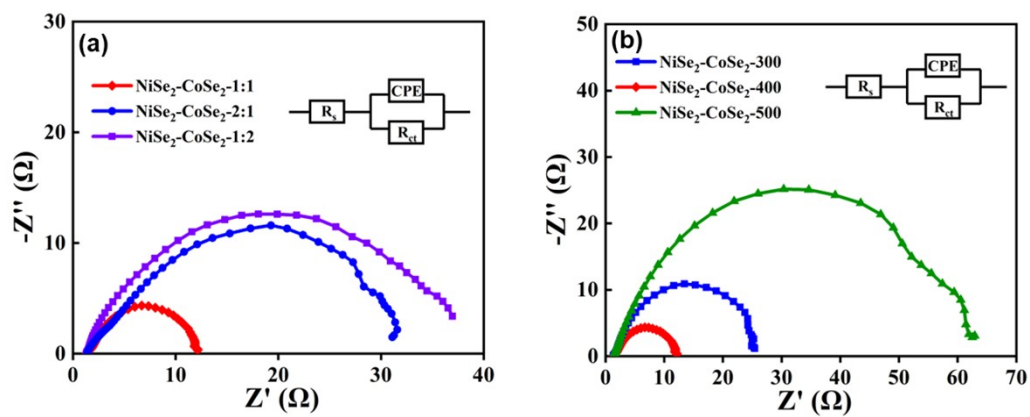

Figure S13. (a) EIS measurements of NiSe<sub>2</sub>-CoSe<sub>2</sub>-1:1, NiSe<sub>2</sub>-CoSe<sub>2</sub>-2:1 and NiSe<sub>2</sub>-CoSe<sub>2</sub>-1:2. (b) EIS measurements of NiSe<sub>2</sub>-CoSe<sub>2</sub>-300, NiSe<sub>2</sub>-CoSe<sub>2</sub>-400 and NiSe<sub>2</sub>-CoSe<sub>2</sub>-500 aerogels.

Figure S14

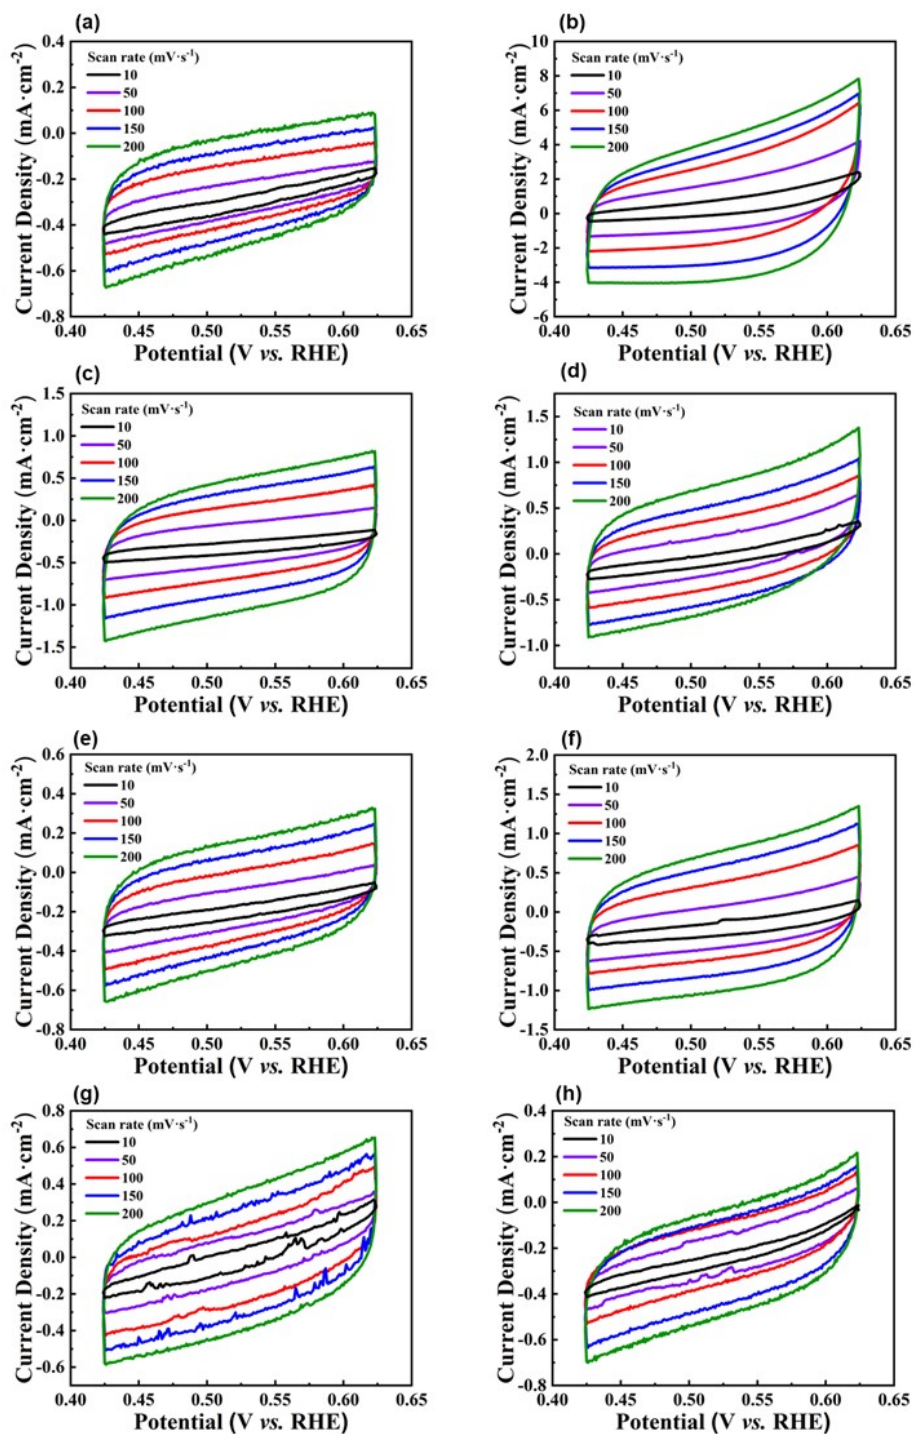

Figure S14. CV curves of all samples: (a) Ni-Co, (b) NiSe<sub>2</sub>-CoSe<sub>2</sub>, (c) NiSe<sub>2</sub>, (d) CoSe<sub>2</sub>, (e) NiSe<sub>2</sub>-CoSe<sub>2</sub>-2:1, (f) NiSe<sub>2</sub>-CoSe<sub>2</sub>-1:2, (g) NiSe<sub>2</sub>-CoSe<sub>2</sub>-300, (h) NiSe<sub>2</sub>-CoSe<sub>2</sub>-500.

Figure S15

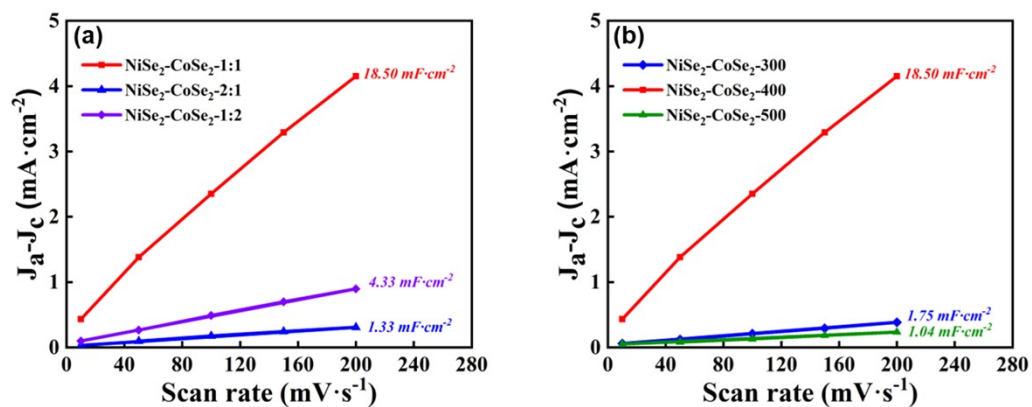

Figure S15. (a)  $C_{dl}$  values of  $\text{NiSe}_2\text{-CoSe}_2\text{-1:1}$ ,  $\text{NiSe}_2\text{-CoSe}_2\text{-2:1}$  and  $\text{NiSe}_2\text{-CoSe}_2\text{-1:2}$ . (b)  $C_{dl}$  values of  $\text{NiSe}_2\text{-CoSe}_2\text{-300}$ ,  $\text{NiSe}_2\text{-CoSe}_2\text{-400}$  and  $\text{NiSe}_2\text{-CoSe}_2\text{-500}$  aerogels.



**Figure S16**

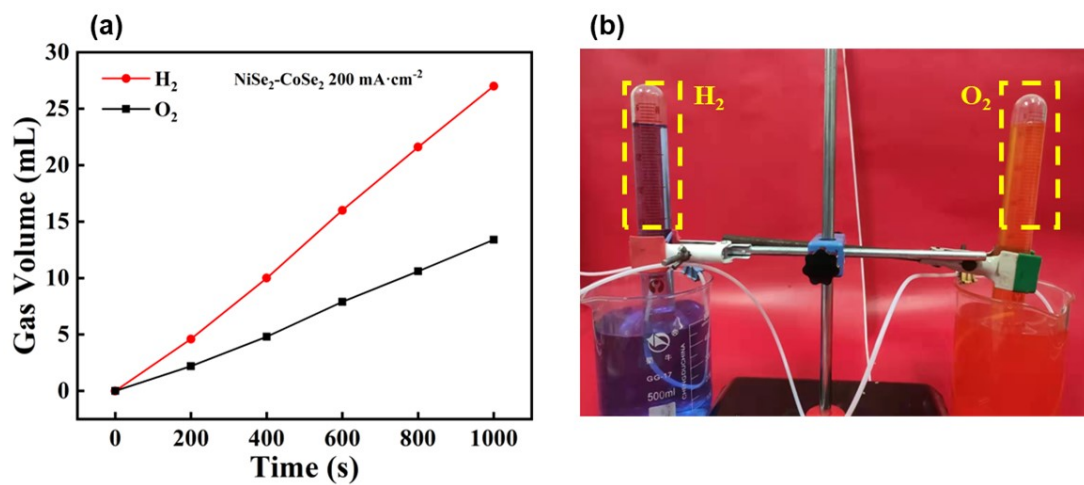

Figure S16. (a) Amounts of gas collected of  $\text{NiSe}_2\text{-CoSe}_2$  during water splitting, pushing with a current density of  $200 \text{ mA}\cdot\text{cm}^{-2}$ . (b) Photo of gas collecting device.

**Figure S17**

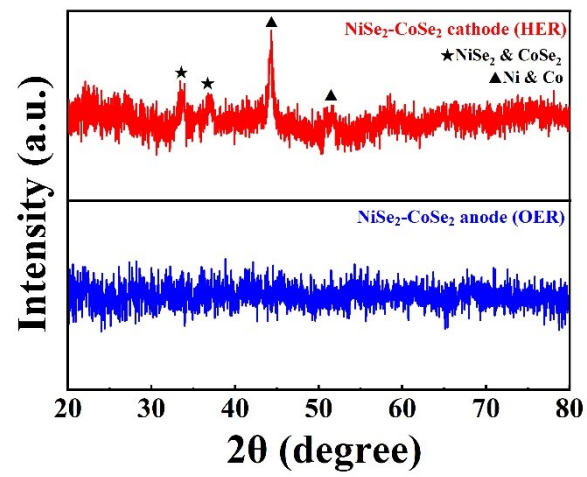

Figure S17. XRD patterns of NiSe<sub>2</sub>-CoSe<sub>2</sub> aerogel after the stability test of overall water splitting

## Table S1

Table S1. ICP-OES results of SEM-EDS of NiSe<sub>2</sub>-CoSe<sub>2</sub>-1:1, NiSe<sub>2</sub>-CoSe<sub>2</sub>-2:1 and NiSe<sub>2</sub>-CoSe<sub>2</sub>-1:2 aerogels.

| Sample                                    | Element | Content (mg/kg) | Mass Fraction (%) |
|-------------------------------------------|---------|-----------------|-------------------|
| NiSe <sub>2</sub> -CoSe <sub>2</sub> -1:1 | Ni      | 287485.64       | 28.75             |
|                                           | Co      | 277957.57       | 27.80             |
|                                           | Se      | 377840.08       | 37.78             |
| NiSe <sub>2</sub> -CoSe <sub>2</sub> -2:1 | Ni      | 303203.24       | 30.32             |
|                                           | Co      | 148425.37       | 14.84             |
|                                           | Se      | 364213.43       | 36.42             |
| NiSe <sub>2</sub> -CoSe <sub>2</sub> -1:2 | Ni      | 187144.77       | 18.71             |
|                                           | Co      | 353980.56       | 35.40             |
|                                           | Se      | 384152.14       | 38.41             |

**Table S2**Table S2.  $C_{dl}$  value comparison of NiSe<sub>2</sub>-CoSe<sub>2</sub> aerogel and reported electrocatalysts.

| Sample                                                           | Morphology                   | $C_{dl}$ value (mF·cm <sup>-2</sup> ) |
|------------------------------------------------------------------|------------------------------|---------------------------------------|
| <b>NiSe<sub>2</sub>-CoSe<sub>2</sub> aerogel<br/>(This work)</b> | <b>Aerogel</b>               | <b>18.50</b>                          |
| CoSe <sub>2</sub> @NiSe <sub>2</sub> /NF[1]                      | Nanowires array              | 16.43                                 |
| (Ni,Co)Se <sub>2</sub> -GA[2]                                    | Nanocages                    | 16.00                                 |
| (Ni, Co) <sub>0.85</sub> Se/NF[3]                                | Nanosheets array             | 3.55                                  |
| Ni <sub>2</sub> P-NiSe <sub>2</sub> /CC[4]                       | Nanosheets and nanoparticles | 31.00                                 |
| NiSe <sub>2</sub> -Ni <sub>2</sub> P/NF[5]                       | Nanowrinkles                 | 39.50                                 |

**Table S3**

Table S3. Performance comparison of NiSe<sub>2</sub>-CoSe<sub>2</sub> aerogel and reported electrocatalysts.

| Sample                                                                                                        | $\eta_{10}$ of HER (mV) | Tafel slope of HER (mV·dec <sup>-1</sup> ) | $\eta_{10}$ of OER (mV) | Tafel slope of OER (mV·dec <sup>-1</sup> ) | Cell voltage of overall water splitting (V) |
|---------------------------------------------------------------------------------------------------------------|-------------------------|--------------------------------------------|-------------------------|--------------------------------------------|---------------------------------------------|
| NiSe <sub>2</sub> -CoSe <sub>2</sub> aerogel (This work)                                                      | 65                      | 57.54                                      | 220                     | 99.57                                      | 1.56 (10 mA·cm <sup>-2</sup> )              |
| (Ni,Co)Se <sub>2</sub> -GA (Powder)[2]                                                                        | 128                     | 79                                         | 250                     | 70                                         | 1.60 (10 mA·cm <sup>-2</sup> )              |
| Ni <sub>0.2</sub> Co <sub>0.8</sub> Se (Powder)[6]                                                            | 73                      | 54.8                                       | 280                     | 86.8                                       | 1.59 (10 mA·cm <sup>-2</sup> )              |
| MoCoSe <sub>x</sub> @NC (Powder)[7]                                                                           | 60                      | 64                                         | -                       | -                                          | -                                           |
| Co <sub>0.8</sub> Mo <sub>0.2</sub> Se (Powder)[8]                                                            | 86.7                    | 58.7                                       | -                       | -                                          | -                                           |
| Co <sub>1.8</sub> Ni(OH) <sub>5.6</sub> @Co <sub>1.8</sub> NiS <sub>0.4</sub> (OH) <sub>4.8</sub> (Powder)[9] | -                       | -                                          | 274                     | 45                                         | -                                           |
| CoSe <sub>2</sub> @NiSe <sub>2</sub> /NF (Self-supporting)[1]                                                 | 162                     | 62.84                                      | 235 ( $\eta_{20}$ )     | 43.24                                      | 1.50 (10 mA·cm <sup>-2</sup> )              |
| NiSe <sub>2</sub> -CoSe <sub>2</sub> /NCF (Self-supporting)[10]                                               | 24                      | 24                                         | 250                     | 48                                         | 1.69 (100 mA·cm <sup>-2</sup> )             |

|                                                                 |       |        |       |       |                                |
|-----------------------------------------------------------------|-------|--------|-------|-------|--------------------------------|
| CoS <sub>2</sub> -MoS <sub>2</sub> /Ti<br>(Self-supporting)[11] | 82    | 59     | 266   | 104   | 1.56 (10 mA·cm <sup>-2</sup> ) |
| Graphdiyne@NiOx(OH) <sub>y</sub> /CC<br>(Self-supporting)[12]   | 154.3 | 183.80 | 292.0 | 98.27 | 1.54 (10 mA·cm <sup>-2</sup> ) |

## Reference

- [1] X. Zhang, Y. Ding, G. Wu, X. Du, CoSe<sub>2</sub>@NiSe<sub>2</sub> nanoarray as better and efficient electrocatalyst for overall water splitting, *Int. J. Hydrogen Energy*. 45 (2020) 30611–30621. <https://doi.org/10.1016/j.ijhydene.2020.08.096>.
- [2] X. Xu, H. Liang, F. Ming, Z. Qi, Y. Xie, Z. Wang, Prussian Blue Analogues Derived Penroseite (Ni,Co)Se<sub>2</sub> Nanocages Anchored on 3D Graphene Aerogel for Efficient Water Splitting, (2017) 3–8. <https://doi.org/10.1021/acscatal.7b02079>.
- [3] K. Xiao, L. Zhou, M. Shao, M. Wei, Fabrication of (Ni,Co)<sub>0.85</sub>Se nanosheet arrays derived from layered double hydroxides toward largely enhanced overall water splitting, *J. Mater. Chem. A*. 6 (2018) 7585–7591. <https://doi.org/10.1039/c8ta01067f>.
- [4] C. Liu, T. Gong, J. Zhang, X. Zheng, J. Mao, H. Liu, Y. Li, Q. Hao, Engineering Ni<sub>2</sub>P-NiSe<sub>2</sub> heterostructure interface for highly efficient alkaline hydrogen evolution, *Appl. Catal. B Environ.* 262 (2020) 1–8. <https://doi.org/10.1016/j.apcatb.2019.118245>.
- [5] P. Wang, Z. Pu, W. Li, J. Zhu, C. Zhang, Y. Zhao, S. Mu, Coupling NiSe<sub>2</sub>-Ni<sub>2</sub>P heterostructure nanowrinkles for highly efficient overall water splitting, *377* (2019) 600–608. <https://doi.org/10.1016/j.jcat.2019.08.005>.
- [6] Z. Qian, Y. Chen, Z. Tang, Z. Liu, X. Wang, Hollow Nanocages of - Ni<sub>x</sub>Co<sub>1-x</sub>Se for Efficient Zinc – Air Batteries and Overall Water Splitting, *Nano-Micro Lett.* 11 (2019) 1–17. <https://doi.org/10.1007/s40820-019-0258-0>.
- [7] Y.N. Zhou, Y. Ma, L. Feng, J. Zhao, Z. Tong, B. Dong, Y.R. Zhu, L. Wang, C.G. Liu, Y.M. Chai, Optimized Mo-doped cobalt selenides coupled carbon nanospheres for efficient hydrogen evolution, *Appl. Surf. Sci.* 531 (2020). <https://doi.org/10.1016/j.apsusc.2020.147404>.
- [8] Y. Zhou, J. Zhang, H. Ren, Y. Pan, Y. Yan, F. Sun, X. Wang, S. Wang, J. Zhang, Mo doping induced metallic CoSe for enhanced electrocatalytic hydrogen evolution, *Appl. Catal. B Environ.* 268 (2020) 118467. <https://doi.org/10.1016/j.apcatb.2019.118467>.
- [9] B. Wang, C. Tang, H.F. Wang, X. Chen, R. Cao, Q. Zhang, A Nanosized CoNi Hydroxide@Hydroxysulfide Core-Shell Heterostructure for Enhanced Oxygen Evolution, *Adv. Mater.* 31 (2019) 1–7. <https://doi.org/10.1002/adma.201805658>.
- [10] D. Chen, Z. Xu, W. Chen, G. Chen, J. Huang, J. Huang, C. Song, C. Li, K. (Ken) Ostrikov, Just add water to split water: ultrahigh-performance bifunctional electrocatalysts fabricated using eco-friendly heterointerfacing of NiCo diselenides, *J. Mater. Chem. A*. 8 (2020) 12035–12044. <https://doi.org/10.1039/d0ta02121k>.
- [11] Y. Li, W. Wang, B. Huang, Z. Mao, R. Wang, B. He, Y. Gong, H. Wang, Abundant heterointerfaces in MOF-derived hollow CoS<sub>2</sub>-MoS<sub>2</sub> nanosheet array electrocatalysts for overall water splitting, *J. Energy Chem.* 57 (2021) 99–108. <https://doi.org/10.1016/j.jechem.2020.08.064>.
- [12] C. Zhang, Y. Xue, L. Hui, Y. Fang, Y. Liu, Y. Li, Graphdiyne@NiO<sub>x</sub>(OH)<sub>y</sub> heterostructure for efficient overall water splitting, *Mater. Chem. Front.* 5 (2021) 5305–5311. <https://doi.org/10.1039/d1qm00466b>.
